# Supplementary material for: Screening and functional prediction of differentially expressed circRNAs in proliferative human aortic smooth muscle cells
Source: PubMed Central journal article supplement (PMC7176856; doi:10.1111/jcmm.15150), 2020-03-10
Supplement: JCMM-24-4762-s001.pdf [file JCMM-24-4762-s001.pdf]

## Supplementary Table S1. The primers used in qRT-PCR experiments

| DEcircRNAs          | Primers sequence (5' to 3')              |
|---------------------|------------------------------------------|
| hsa_circ_0083756    | Forward: GAGACGGAGGTGCTGGCACATGA         |
|                     | Reverse: TGGCCTGCTCCTCCACTCTCAAG         |
| hsa_circ_0007888    | Forward: CTTTGGCGATTCTCAGTAAATACCACC     |
|                     | Reverse: CACAGGAGAAAGTACCAGCTGAGCGTC     |
| hsa_circ_0006677    | Forward: CGTTAGGGCAGTTTACAAGGTCAGTTTTAGG |
|                     | Reverse: ACTTCTTTGGTTGTGTGGCATTGTTCTGT   |
| hsa_circ_0009065    | Forward: GGTTTCCCCAAAGTCAGTATTCTCCTCA    |
|                     | Reverse: GGTTTCATCTCTCTCAAGGTCCATTGTGTTC |
| hsa_circ_0007146    | Forward: CTGTAAAGTGTGAGCACCATTGTCC       |
|                     | Reverse: ACACACACCACGGTGGACACTT          |
| hsa_circ_0057072    | Forward: AGGTCAAGGCTATGGTGCTCAAC         |
|                     | Reverse: TGGTGTTACATTTGTAAGTCTGCCAGTTTCT |
| hsa_circ_0023406    | Forward: ATGGTCCTCATCCTCATCGCAAC         |
|                     | Reverse: TGCATAGCTTCATGGCCACG            |
| hsa_circ_0009792    | Forward: GCTCCGGACTATGACCACTTGAC         |
|                     | Reverse: CAGCCAATGAGGCCCGAGT             |
| hsa_circ_0007422    | Forward: CATCCGTCGCTTCCTGAACCTT          |
|                     | Reverse: ATTCAAGAGAGCCGTCCAAGTGC         |
| hsa_circ_0004872    | Forward: CCGTGTGTCAGATCCAGACCATG         |
|                     | Reverse: CAGTAGGTCTGGTGCTCAAAGGGG        |
| hsa_circ_0040705    | Forward: CCACTTTGCAGCCATTTTTCACG         |
|                     | Reverse: GCAACGACACTGGTTTATGOATTAGGG     |
| hsa_circ_0002720    | Forward: CCGAGCCACGCATTTACATCAGT         |
|                     | Reverse: TTGGCCTTGAAAGTCCCAGATGG         |
| hsa_circ_0001304    | Forward: CATCCGCCTCATAAAAGACAAACAGAC     |
|                     | Reverse: CCTGTTTTCTCTTCATCAGCCTCAC       |
| has- $\beta$ -actin | Forward: GACTTAGTTGCGTTACACCCTTTCTTG     |
|                     | Reverse: ACTGCTGTACCTTCACCGTTCC          |

qRT-PCR: quantitative real-time polymerase chain reaction

DEcircRNAs: differentially expressed circRNAs
