# Supplementary material for: Screening and functional prediction of differentially expressed circRNAs in proliferative human aortic smooth muscle cells
Source: PubMed Central journal article supplement (PMC7176856; doi:10.1111/jcmm.15150), 2020-03-10
Supplement: JCMM-24-4762-s002.pdf [file JCMM-24-4762-s002.pdf]

Supplementary Table S2. DEcircRNAs with circRNA conservation

| DEcircRNAs<br>(up) | Conserved mouse<br>circRNAs | DEcircRNAs<br>(down) | Conserved mouse<br>circRNAs |
|--------------------|-----------------------------|----------------------|-----------------------------|
| hsa_circ_0000520   | mmu_circ_0000536            | hsa_circ_0011120     | mmu_circ_0011284            |
| hsa_circ_0009581   | mmu_circ_0011447            | hsa_circ_0007895     | mmu_circ_0001277            |
| hsa_circ_0002720   | chr4_136693734_136696154_-  | hsa_circ_0007364     | chr4_129838977_129842762_+  |
| hsa_circ_0002454   | mmu_circ_0010983            | hsa_circ_0020097     | mmu_circ_0000967            |
| hsa_circ_0006371   | chr19_41552448_41555701_+   | hsa_circ_0000284     | mmu_circ_0001052            |
| hsa_circ_0003110   | mmu_circ_0010255            | hsa_circ_0000369     | chr9_32461250_32476773_-    |
| hsa_circ_0032704   | mmu_circ_0004297            | hsa_circ_0038111     | chr16_14419699_14423260_+   |
| hsa_circ_0034326   | mmu_circ_0014342            | hsa_circ_0046123     | mmu_circ_0002826            |
| hsa_circ_0003838   | chr2_120760196_120777599_-  | hsa_circ_0060733     | chr2_166921969_166922844_+  |
| hsa_circ_0036399   | chr9_55482272_55488929_-    | hsa_circ_0002657     | mmu_circ_0005921            |
| hsa_circ_0000665   | chr17_25264765_25269479_-   | hsa_circ_0001246     | mmu_circ_0005924            |
| hsa_circ_0002598   | mmu_circ_0003485            | hsa_circ_0067772     | mmu_circ_0010754            |
| hsa_circ_0046599   | mmu_circ_0002856            | hsa_circ_0001402     | chr5_64311058_64324609_+    |
| hsa_circ_0046600   | chr11_121639751_121651673_- | hsa_circ_0004136     | chr1_21535060_21593614_-    |
| hsa_circ_0049392   | chr9_21742186_21742796_-    | hsa_circ_0004365     | mmu_circ_0012389            |
| hsa_circ_0003218   | mmu_circ_0008831            | hsa_circ_0001741     | mmu_circ_0013256            |
| hsa_circ_0059702   | mmu_circ_0009441            | hsa_circ_0083756     | chr14_66304004_66304235_+   |
| hsa_circ_0004968   | chr16_58424560_58424788_+   | hsa_circ_0087641     | chr13_64209106_64247318_-   |
| hsa_circ_0081789   | mmu_circ_0012433            | hsa_circ_0008240     | mmu_circ_0009881            |
| hsa_circ_0002702   | chr4_43414627_43416718_+    |                      |                             |
| hsa_circ_0002191   | mmu_circ_0004730            |                      |                             |
| hsa_circ_0089974   | chrX_161871468_161875392_-  |                      |                             |

DEcircRNAs: differentially expressed circRNAs
