# Supplementary material for: Screening and functional prediction of differentially expressed circRNAs in proliferative human aortic smooth muscle cells
Source: PubMed Central journal article supplement (PMC7176856; doi:10.1111/jcmm.15150), 2020-03-10
Supplement: JCMM-24-4762-s003.pdf [file JCMM-24-4762-s003.pdf]

Supplementary Table S3. 77 AGO-bounded circRNAs

| circRNA ID       | Chromosome | Start     | Stop      | Strand |
|------------------|------------|-----------|-----------|--------|
| hsa_circ_0004368 | chr6       | 139264649 | 139265759 | -      |
| hsa_circ_0009065 | chr16      | 14738130  | 14738466  | +      |
| hsa_circ_0000520 | chr14      | 20811436  | 20811559  | -      |
| hsa_circ_0005785 | chr12      | 110819556 | 110834257 | -      |
| hsa_circ_0000069 | chr1       | 47745912  | 47748131  | -      |
| hsa_circ_0029605 | chr13      | 20235837  | 20244503  | +      |
| hsa_circ_0001741 | chr7       | 128655032 | 128658211 | -      |
| hsa_circ_0046188 | chr17      | 79555969  | 79575848  | -      |
| hsa_circ_0038111 | chr16      | 16146580  | 16150152  | +      |
| hsa_circ_0000519 | chr14      | 20811436  | 20811534  | -      |
| hsa_circ_0087493 | chr9       | 95018961  | 95048121  | -      |
| hsa_circ_0007364 | chr1       | 32381495  | 32385259  | -      |
| hsa_circ_0038350 | chr16      | 19627435  | 19702793  | +      |
| hsa_circ_0007895 | chr1       | 28362054  | 28384605  | -      |
| hsa_circ_0002579 | chr19      | 11223953  | 11224438  | +      |
| hsa_circ_0011120 | chr1       | 28362054  | 28369161  | -      |
| hsa_circ_0004099 | chr11      | 9225206   | 9229179   | -      |
| hsa_circ_0004565 | chr3       | 149563797 | 149619949 | +      |
| hsa_circ_0002454 | chr1       | 65830317  | 65831879  | +      |
| hsa_circ_0007422 | chr2       | 200173482 | 200298237 | -      |
| hsa_circ_0007018 | chr16      | 69189773  | 69201088  | +      |
| hsa_circ_0068631 | chr3       | 195802029 | 195803993 | -      |
| hsa_circ_0088807 | chr9       | 131271154 | 131271376 | +      |
| hsa_circ_0004365 | chr7       | 80418621  | 80440017  | -      |
| hsa_circ_0032389 | chr14      | 71428942  | 71462642  | +      |
| hsa_circ_0083756 | chr8       | 27151596  | 27151827  | -      |
| hsa_circ_0001246 | chr22      | 46096161  | 46136418  | +      |
| hsa_circ_0002714 | chr7       | 80418621  | 80435074  | -      |
| hsa_circ_0040705 | chr16      | 84792321  | 84801964  | +      |
| hsa_circ_0003692 | chr3       | 171969049 | 172028671 | +      |
| hsa_circ_0006903 | chr12      | 133310970 | 133312098 | -      |
| hsa_circ_0004968 | chr3       | 98600383  | 98600611  | -      |
| hsa_circ_0016404 | chr1       | 212977661 | 212977993 | +      |
| hsa_circ_0059175 | chr20      | 1115763   | 1115949   | +      |
| hsa_circ_0007367 | chr9       | 33948371  | 33956144  | -      |
| hsa_circ_0057072 | chr2       | 172782046 | 172823470 | +      |
| hsa_circ_0064557 | chr3       | 18456602  | 18462483  | -      |
| hsa_circ_0004872 | chr22      | 22153300  | 22162135  | -      |
| hsa_circ_0004870 | chr20      | 34302106  | 34313077  | -      |
| hsa_circ_0020929 | chr11      | 3988781   | 4080626   | +      |
| hsa_circ_0008012 | chr4       | 103446668 | 103459113 | +      |
| hsa_circ_0001147 | chr20      | 34304661  | 34313077  | -      |
| hsa_circ_0092288 | chr3       | 49070226  | 49070546  | -      |
| hsa_circ_0060733 | chr20      | 47682728  | 47683817  | +      |

|                  |       |           |           |   |
|------------------|-------|-----------|-----------|---|
| hsa_circ_0002940 | chr12 | 69983264  | 69987393  | + |
| hsa_circ_0059702 | chr20 | 30142548  | 30149539  | + |
| hsa_circ_0008274 | chr13 | 96485180  | 96489456  | - |
| hsa_circ_0005483 | chr16 | 929569    | 961079    | - |
| hsa_circ_0002598 | chr17 | 58700881  | 58711338  | + |
| hsa_circ_0002657 | chr22 | 46085591  | 46125470  | + |
| hsa_circ_0000077 | chr1  | 62171487  | 62175109  | - |
| hsa_circ_0009581 | chr1  | 8555122   | 8601377   | - |
| hsa_circ_0051732 | chr19 | 48660270  | 48660397  | - |
| hsa_circ_0079375 | chr7  | 6618131   | 6624891   | + |
| hsa_circ_0021569 | chr11 | 32948702  | 32949669  | + |
| hsa_circ_0086740 | chr9  | 34011624  | 34017187  | - |
| hsa_circ_0075736 | chr6  | 17669523  | 17669777  | - |
| hsa_circ_0009131 | chr3  | 183454505 | 183480067 | + |
| hsa_circ_0003945 | chr9  | 33953282  | 33956144  | - |
| hsa_circ_0006371 | chr10 | 98708764  | 98711953  | + |
| hsa_circ_0000395 | chr12 | 46622935  | 46624417  | - |
| hsa_circ_0036399 | chr15 | 76566752  | 76580286  | - |
| hsa_circ_0004200 | chr15 | 96826060  | 96834012  | - |
| hsa_circ_0003218 | chr2  | 203329531 | 203332412 | + |
| hsa_circ_0084429 | chr8  | 48817428  | 48842572  | - |
| hsa_circ_0002224 | chr10 | 51374369  | 51387763  | + |
| hsa_circ_0067772 | chr3  | 155547476 | 155560408 | - |
| hsa_circ_0030741 | chr13 | 100206557 | 100207901 | + |
| hsa_circ_0000665 | chr16 | 1364020   | 1370518   | + |
| hsa_circ_0046600 | chr17 | 80962990  | 80992975  | - |
| hsa_circ_0068610 | chr3  | 195785154 | 195787118 | - |
| hsa_circ_0087890 | chr9  | 111795586 | 111812972 | - |
| hsa_circ_0072255 | chr5  | 37326002  | 37328522  | - |
| hsa_circ_0046599 | chr17 | 80962990  | 80972395  | - |
| hsa_circ_0001535 | chr5  | 137320945 | 137324004 | - |
| hsa_circ_0000284 | chr11 | 33307958  | 33309057  | + |
| hsa_circ_0002702 | chr9  | 35546426  | 35548532  | + |

AGO: argonaute.
